# Supplementary material
Source: PubMed Central journal article supplement (PMC10991222)
Supplement: 262_2022_3241_MOESM3_ESM.pdf [file 262_2022_3241_MOESM3_ESM.pdf]

## Supplementary material

### Primer sequences for qRT-PCR

| Gene          | sequence                      |
|---------------|-------------------------------|
| ICAM3 forward | 5'-GGAGTTCCTTTTGCGGGTG-3'     |
| ICAM3 reverse | 5'-TCAGAGCTGGGACAATCAGTA-3'   |
| IRF5 forward  | 5'-GGGCTTCAATGGGTCAACG-3'     |
| IRF5 reverse  | 5'-GCCTTCGGTGTATTTCCCTG-3'    |
| IKZF1 forward | 5'-TTCCGTGATCCTTTTGAGTGC-3'   |
| IKZF1 reverse | 5'-CTCGCGTTATGTGCGACGA-3'     |
| CD206 forward | 5'-CTACAAGGGATCGGGTTTATGGA-3' |
| CD206 reverse | 5'-TTGGCATTGCCTAGTAGCGTA-3'   |
| IRF4 forward  | 5'-GCTGATCGACCAGATCGACAG-3'   |
| IRF4 reverse  | 5'-CGGTTGTAGTCCTGCTTGC-3'     |
| ICAM1 forward | 5'-ATGCCCAGACATCTGTGTCC-3'    |
| ICAM1 reverse | 5'-GGGGTCTCTATGCCCAACAA-3'    |
| CCL17 forward | 5'-AGGGAGCCATTCCCCTTAGA-3'    |
| CCL17 reverse | 5'-CTCTTGTTGTTGGGGTCCGA-3'    |
| CCL24 forward | 5'-TCTGCAAGGACCCGAGCTATT-3'   |
| CCL24 reverse | 5'-TGACCACTCGGTTCTCAGGA-3'    |
| CD163 forward | 5'-GACGCATTTGGATGGATCATGT-3'  |
| CD163 reverse | 5'-CCCACCGTCCTTGAATTGA        |
| GAPDH forward | 5'-ACGGATTTGGTCGTATTGGGC-3'   |
| GAPDH reverse | 5'-TTGACGGTGCCATGGAATTG-3'    |

### Analysis pipeline for RNAseq procedure

#### Data preprocessing:

| Sample ID | Raw reads  | depth | Raw bases(G) |
|-----------|------------|-------|--------------|
| Con-1     | 40,579,030 | 40M   | 6.09         |
| Con-2     | 43,012,668 | 43M   | 6.49         |

|                  |            |     |      |
|------------------|------------|-----|------|
| IL-32(10ng/ml)-1 | 47,062,514 | 47M | 7.11 |
| IL-32(10ng/ml)-2 | 49,708,672 | 49M | 7.47 |
| IL-32(40ng/ml)-1 | 53,093,038 | 53M | 7.96 |
| IL-32(40ng/ml)-2 | 44,297,068 | 44M | 6.69 |

- 1) Raw reads were filtered to get the clean Reads by Seqtk software;
- 2) Hisat2 (version: 2.0.4) software was adopted for clean Reads mapping genome. The genome file is [ftp://ftp.ensembl.org/pub/release-83/fasta/homo\\_sapiens/dna/Homo\\_sapiens.GRCh38.dna.primary\\_assembly.fa.gz](ftp://ftp.ensembl.org/pub/release-83/fasta/homo_sapiens/dna/Homo_sapiens.GRCh38.dna.primary_assembly.fa.gz);
- 3) Convert the aligned sam files to Bam files with samtools;
- 4) Bam files were assembled and quantified by Stringtie (version: 1.3.0);
- 5) The edgeR package in R software was used to perform differential gene analysis to calculate Fold-change, p-value and q-value.
